# Supplementary material for: Structural design and preparation of high-performance QD-encoded polymer beads for suspension arrays
Source: Royal Society of Chemistry journal article supplement (doi:10.1039/c0jm02447c), 2010-12-21
Supplement: c0jm02447c.pdf [file c0jm02447c.pdf]

## Supplementary Information

### Structural Design and Preparation of High-performance QD-encoded Polymer Beads for Suspension Arrays

Tao Song, Qi Zhang, Chaoliang Lu, Xiaoqun Gong, Qiuhua Yang, Yunhong Li, Junqing Liu and Jin Chang\*

*Institute of Nanobiotechnology, School of Materials Science and Engineering, Tianjin University and Tianjin Key Laboratory of Composites and Functional Materials, Tianjin, 300072, P. R. China*

#### 1.1 FTIR spectra of cross-linked PSEMBs

FTIR spectra were acquired on a FTS-6000 FTIR (Bio-Rad) spectrometer using KBr pellets in the range from 4000 to 400  $\text{cm}^{-1}$ . Samples were dried overnight using a vacuum drying oven.

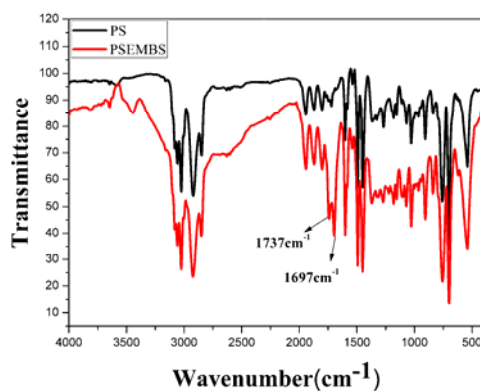

Fig.S1 The FTIR spectra of PS and Cross-linked PSEMBs

In comparison with the FTIR of PS, the characteristic signals of  $\text{-C=O}$  at 1697  $\text{cm}^{-1}$  and 1737  $\text{cm}^{-1}$  and the  $\text{-OH}$  at 2500-3500  $\text{cm}^{-1}$  were observed in spectrum of PSEMBS.

---

\* Corresponding author. Tel.: +86-022-27401821 E-mail: [jinchang@tju.edu.cn](mailto:jinchang@tju.edu.cn)

## 1.2 Swelling properties of the cross-linked PSEMBs

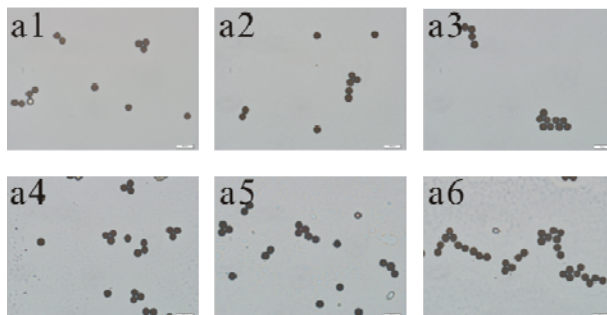

Fig.S2 cross-linked PSEMBs in solvent mixtures containing (a) 100 % isopropanol; (b) 5 % chloroform and 95 % isopropanol; (c) 20 % chloroform and 80 % isopropanol; (d) 40 % chloroform and 60 % isopropanol; (e) 60 % chloroform and 40 % isopropanol; (f) 100 % chloroform (vol/vol). The scale bar is 50  $\mu\text{m}$ .

The swelling properties of the cross-linked PSEMBs in mixtures of isopropanol (a poor solvent for PS) and chloroform (a good solvent for PS) are shown in Fig. s2, as a function of increasing chloroform concentration, the extent of microspheres swelling is hardly changed.

### 1.3 TEM images and PL spectra of $\text{Cd}_x\text{Zn}_{1-x}\text{Se}_y\text{S}_{1-y}$ QDs

TEM images were obtained on a transmission electron microscope (JEOL, JEM-100SX) operated with an accelerating voltage of 80~100 kV. Samples for TEM were prepared by placing a drop of the diluted sample on a 400-mesh carbon-coated copper grid.

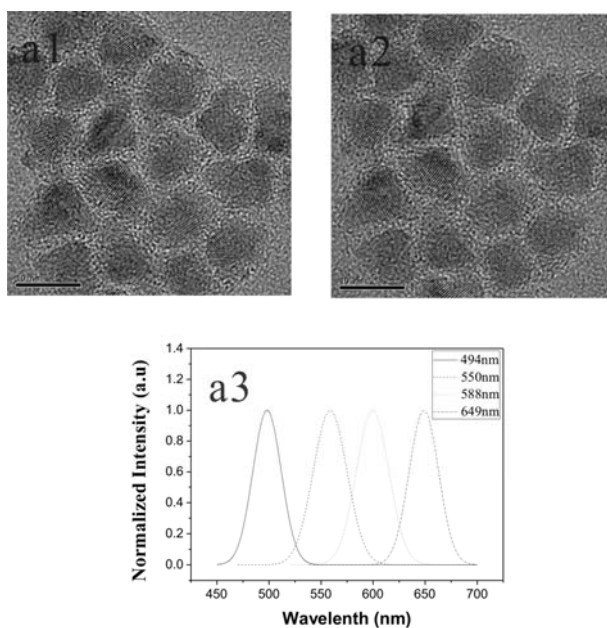

Fig.S3 TEM photographs of QDs (a1, a2) and PL spectra of  $\text{Cd}_x\text{Zn}_{1-x}\text{Se}_y\text{S}_{1-y}$  nanocrystals with emission wavelength of 494 nm, 550 nm, 588 nm and 649 nm (a3). The scale bar is 10 nm.

#### 1.4 SEM images of macro-porous beads

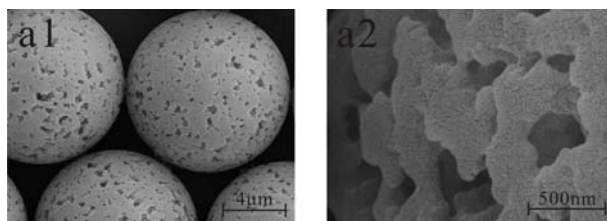

Fig.S4 SEM images of macro-porous beads from Baseline co. Ltd. (a1)  $\times 30000$ , (a2) the portion magnitude pictures of a single bead,  $\times 500000$

Fig.S4 shows that the pore size of macro-porous beads from baseline co. Ltd is about 100-450 nm.
